# Supplementary material for: A tunable 3D optofluidic waveguide dye laser via two centrifugal Dean flow streams
Source: Royal Society of Chemistry journal article supplement (doi:10.1039/c1lc20435a), 2011-01-01
Supplement: c1lc20435a.pdf [file c1lc20435a.pdf]

## Electronic Supplementary Information

### **A tunable 3D optofluidic waveguide dye laser via two centrifugal Dean flow streams**

Y. Yang<sup>1</sup>, A. Q. Liu<sup>1\*</sup>, L. Lei<sup>1</sup>, L. K. Chin<sup>1</sup>, C. D. Ohl<sup>2</sup>, Q. J. Wang<sup>1</sup>, and H. S. Yoon<sup>3</sup>

<sup>1</sup>*School of Electrical and Electronic Engineering*

<sup>2</sup>*School of Physical and Mathematical Sciences*

<sup>3</sup>*School of Biological Sciences*

*Nanyang Technological University, Nanyang Avenue, Singapore 639798*

(\* Tel: +65 6790-4336; Fax: +65 6793-3318; Email: [eaqliu@ntu.edu.sg](mailto:eaqliu@ntu.edu.sg))

### **Contents**

- (1) Simulation results of the confinement by 2D liquid waveguide and 3D liquid waveguide
- (2) The relationship of the volume ratio of the liquid core and the parameter  $\phi$ .

*Simulation results of the confinement by 2D liquid waveguide and 3D liquid waveguide:*

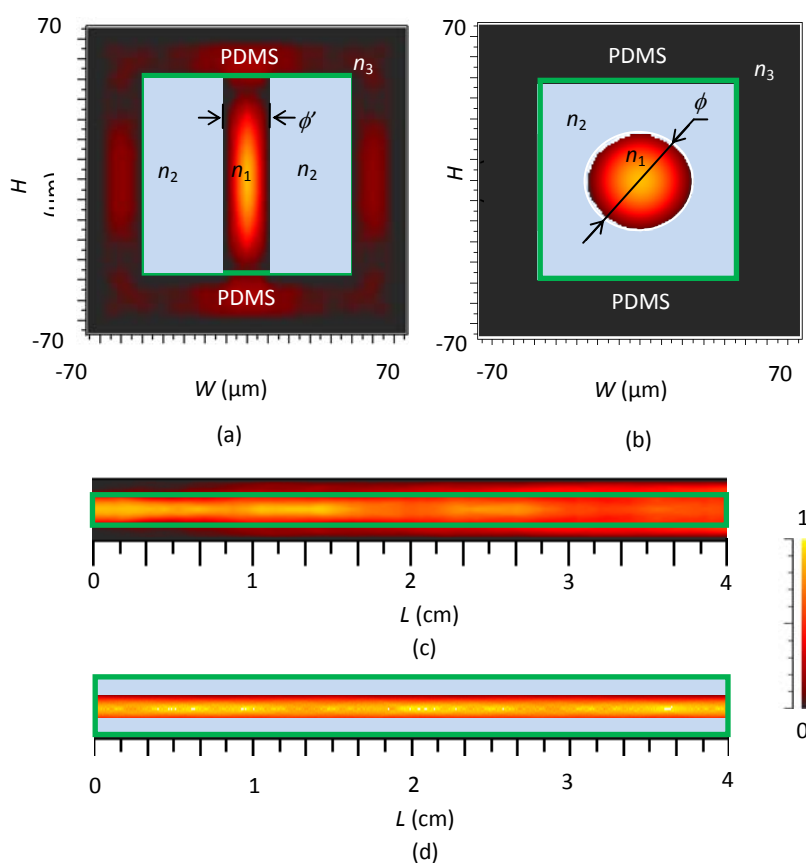

**Fig. S1** Simulation results of the confinement by 2D liquid waveguide and 3D liquid waveguide. The cross-sectional intensity at the end of (a) 2D waveguide, and (b) 3D waveguide. The intensity field along the waveguide length in the vertical direction of (c) 2D waveguide, and (d) 3D waveguide. Inside green line: liquids. Outside the green line: PDMS. The light blue areas represent the DI water claddings.

*The relationship of the volume ratio of the liquid core and the parameter  $\phi$ :*

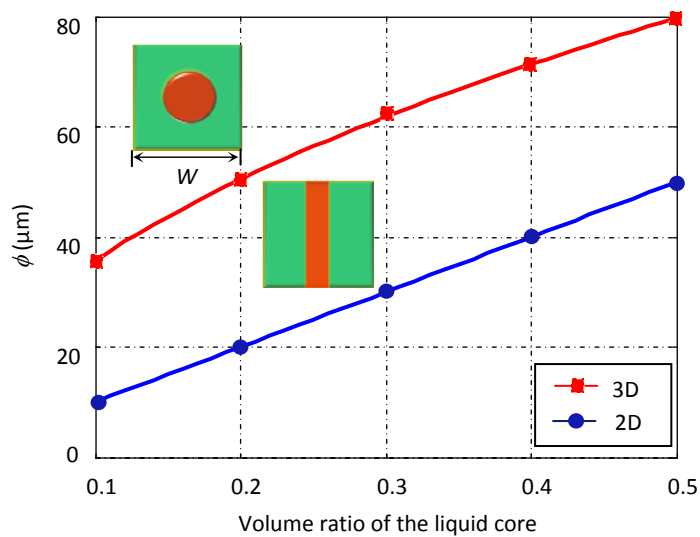

**Fig. S2** The relationship of the volume ratio of the liquid core and the parameter  $\phi$ .
